# Supplementary material
Source: publisher site journal article supplement (https://www.spandidos-publications.com/4043/downloadSupplementary)
Supplement: Supplementary file 1 [file downloadSupplementary]

## Sheet: PSI filtered
Table SIV. PSI filtered DS candidates.
Overview, on how the inclusion junction counts and the exclusion junction counts are distributed
for the remaining candidates of the BC'-H1, BC'-H2, NSP'-G1, NSP'-G2 comparisons filtered by the PSI criteria (PSI 0.1 to 0.9 and PSI difference 0.5 to 0.9).
The JCEC section supports one JC candidate which indeed shows that the on exon counts do not really stabilize the junction counts.
The PSI scores based on the rMATS results here are slightly deviating from the values in the Sashimi plots based on the MISO package used for the visualization because the Sashimi plot algorithms are applying their own scoring scheme.
Katz Y, et al (PMID: 21057496)
Set name nomenclature
i: intersection
Header description
Comment: a note, if ERG-FLI1 or ERG-ERG samples are compared
s1, s2: sample 1 and sample 2 of the DS
IJC: inclusion read counts
SJC: exclusion (skipping) read counts
FDR: false discovery rate, corrected p value
PSI: percentage spliced-in
Passing PSI criteria
Approach	Set name	Splice type	Gene symbol	Chromosome	Strand	FDR	PSI s1	PSI s2	PSI difference	s1 IJC	s1 SJC	s2 IJC	s2 SJC
JC	BC'iH1	SE	ATP13A3	chr3	-	0.0398428	0.9	0.4	0.5	73	8	2	3
	BC'iH2	SE	EPB41	chr1	+	7.21155e-10	0.9	0.18	0.72	57	6	12	55
	NSP'iG1	MX	TSPAN3	chr15	-	0.000694346	0.22	0.73	0.51	53	191	11	4
	NSP'iG2	MX	TSPAN3	chr15	-	6.85301e-11	0.22	0.73	0.51	53	191	66	25
	NSP'iG2	RI	ACADVL	chr17	+	2.29283e-10	0.84	0.11	0.73	132	26	8	65
	NSP'iG2	SE	NOP58	chr2	+	0.00408892	0.2	0.82	0.62	13	52	9	2
Additionally in
JCEC	BC'iH1	SE	EPB41	chr1	+	3.99607e-05	0.16	0.86	0.7	18	96	12	2
Not passing PSI criteria
Approach	Set name	Splice type	Gene symbol	Chromosome	Strand	FDR	PSI s1	PSI s2	PSI difference	s1 IJC	s1 SJC	s2 IJC	s2 SJC
JC	BC'iH1	SE	HLCS	chr21	-	0.0392188	0	0.67	0.67	0	6	2	1
	BC'iH1	SE	POC5	chr5	-	0.000733919	0.83	0	0.83	20	4	0	2
	BC'iH1	RI	OGT	chrX	+	0.0228428	0.63	1	0.37	34	20	3	0
	BC'iH1	A3	TCAIM	chr3	+	4.28782e-05	0.32	1	0.68	29	62	9	0
	BC'iH1	SE	TRA2A	chr7	-	0.0398428	0.1	1	0.9	9	80	1	0
	BC'iH2	A3	KMO	chr1	+	0.00101313	0.96	0.2	0.76	616	28	1	4
	BC'iH2	RI	SNHG1	chr11	-	0	0.94	0.51	0.43	195	12	71	67
	BC'iH2	A5	STRADA	chr17	-	0.00730221	0.71	1	0.29	12	5	8	0
	BC'iH2	MX	SNHG17	chr20	-	1.70986e-06	0	0.58	0.58	0	7	7	5
	BC'iH2	SE	TRDMT1	chr10	-	0.0451921	0.8	1	0.2	37	9	16	0
	NSP'iG1	SE	POLDIP3	chr22	-	0.0408393	0.6	1	0.4	40	27	1	0
	NSP'iG1	A3	RMDN1	chr8	-	0.0296654	0.7	1	0.3	30	13	5	0
	NSP'iG1	RI	SMARCB1	chr22	+	0.00413794	0.52	1	0.48	57	52	4	0
	NSP'iG2	SE	AC022826.2	chr8	-	0.047077	0.91	1	0.09	163	17	22	0
	NSP'iG2	A3	LMO7	chr13	+	3.25852e-05	0.07	1	0.93	7	91	4	0
	NSP'iG2	RI	SELENBP1	chr1	-	1.07032e-05	0.74	0	0.74	28	10	0	10
	NSP'iG2	SE	TM7SF3	chr12	-	5.82923e-05	0.54	1	0.46	29	25	23	0
	NSP'iG2	A5	ZFAND1	chr8	-	0.000208105	0.67	1	0.33	34	17	24	0
	NSP'iG2	SE	ZNF283	chr19	+	0.034651	0.62	1	0.38	10	6	2	0

## Sheet: DS and DE read counts
Table SIV. DS and DE read counts.
Overview, on how the inclusion junction counts and the exclusion junction counts are distributed in comparison to the normalized expression counts per condition.
It can be seen that these read counts on average account for 0.1 to 1.4% of the gene expression counts in the presented study (mean_amount).
Header description
s1, s2: sample 1 and sample 2 of the DS
IJC: inclusion read counts
SJC: exclusion (skipping) read counts
PSI: percentage spliced-in
Splice events: Description of SE, MX, A3 see supplementary Figure S4
				DS		counts					DE	counts
GeneID	GeneSymbol	chr	strand	PSI_sum_s1	PSI_sum_s2	s1 IJC	s1 SJC	s2 IJC	s2 SJC	mean_amount (%)		SP1	SP2	SP3	NSP1	NSP2	NSP3	nst1	nst2	nst3	nso1	nso2	nso3	hFIB1	hFIB2	hFIB3	hFIB4	MSC1	MSC2	MSC3	MSC4	ES1	ES2
ENSG00000133657.16	ATP13A3	chr3	-	0.9	0.4	73	8	2	3	0.133654	ATP13A3	11288.6	5761.01	9240.98	9660.28	6215.95	4117.09	10037.4	5732.78	4950.33	10059.8	6328.07	3688.59	59888.5	64862.4	25087.2	41760.6	13517.8	15231.8	11497.9	10691.9	10863.4	13417.6
ENSG00000159023.21	EPB41	chr1	+	0.9	0.18	57	6	12	55	0.50757	EPB41	10545.1	7290.79	5903	11750.5	7590.36	6675.79	10995.1	6925.55	6413.53	11600.4	7382.51	6073.76	1649.17	1132	1359.56	1618.75	965.606	633.214	950.38	532.705	11315.9	21563.6
ENSG00000140391.15	TSPAN3	chr15	-	0.22	0.73	53	191	11	4	1.07504	TSPAN3	5974.69	6761.82	6186	6170.41	7139.86	4807.84	5231.29	6207.95	4916.85	5333.89	6985.95	5171.17	7042.72	4576.04	6570.96	5329.27	9195.67	7322.53	8426.88	7514.56	2808.34	2832.19
ENSG00000055044.11	NOP58	chr2	+	0.2	0.82	13	52	9	2	0.602368	NOP58	6581.46	4249.74	3761.3	5381.13	3825.34	2522.31	5534.12	4125.17	3012.18	5343.78	4207.15	2198.76	1340.07	2305.77	1346.78	1520.65	964.325	1256.02	933.329	1119.4	3619.95	4244.07
ENSG00000140391.15	TSPAN3	chr15	-	0.22	0.73	53	191	66	25	1.39049	TSPAN3.1	5974.69	6761.82	6186	6170.41	7139.86	4807.84	5231.29	6207.95	4916.85	5333.89	6985.95	5171.17	7042.72	4576.04	6570.96	5329.27	9195.67	7322.53	8426.88	7514.56	2808.34	2832.19
